# Supplementary material for: Use of a Mental Health Center Collaborative Care Team to Improve Diabetes Care and Outcomes for Patients With Psychosis
Source: Atypon-hosted journal article supplement (doi:10.1176/appi.ps.201700153), 2017-12-01
Supplement: appi.ps.201700153.ds001.pdf [file appi.ps.201700153.ds001.pdf]

**Figure 1. CONSORT diagram**

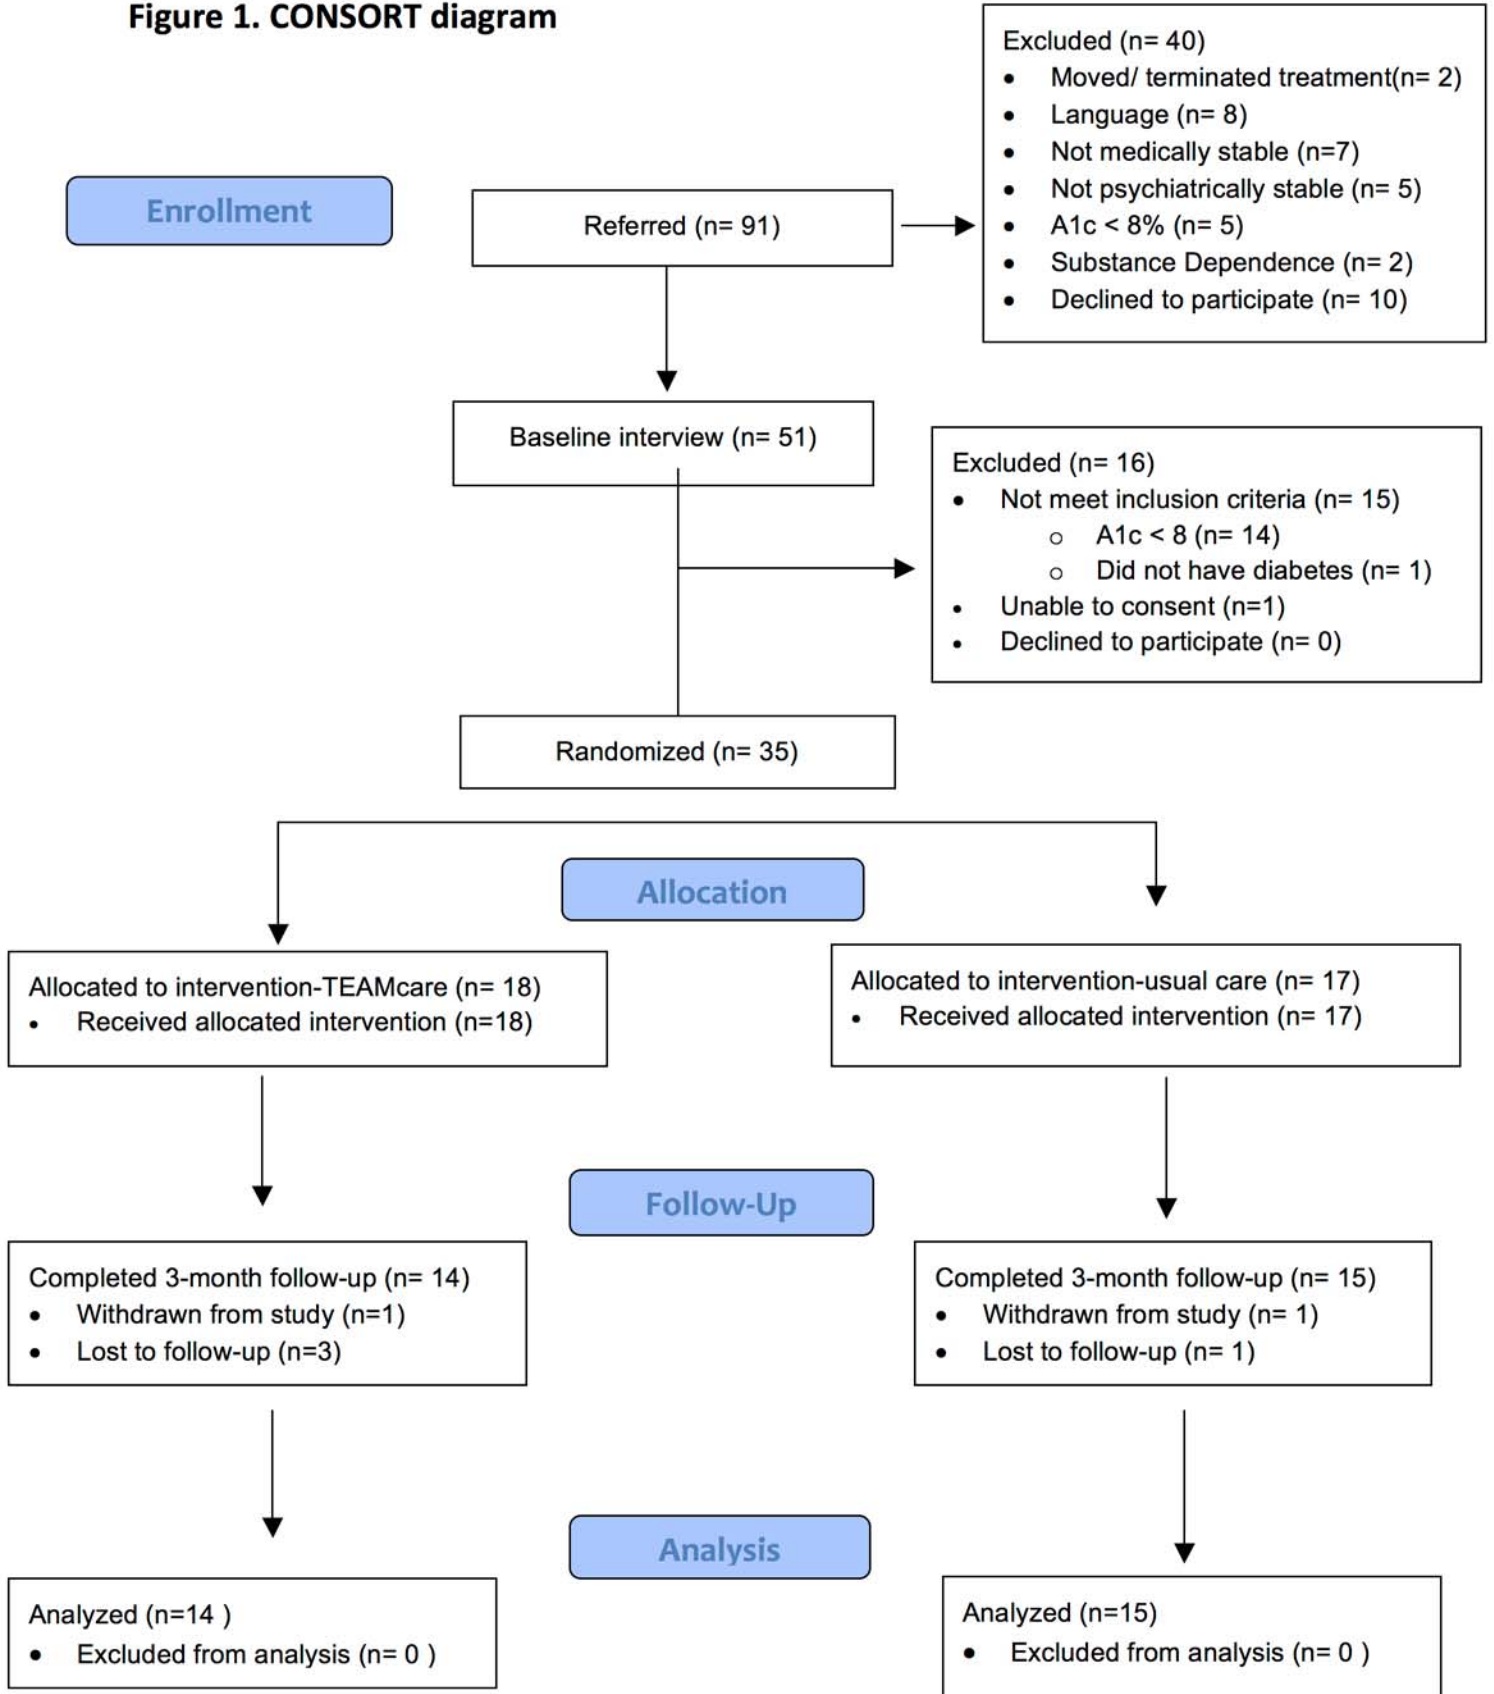

**Table 1. Collaborative Care Core Components and Adaptations for CMHC setting based on Stakeholder Input**

| Core Components of Collaborative Care <sup>22</sup> | Adapted Elements                                                                                                                                                                                                                                                                                                             |
|-----------------------------------------------------|------------------------------------------------------------------------------------------------------------------------------------------------------------------------------------------------------------------------------------------------------------------------------------------------------------------------------|
| Person-centered care                                | <ul style="list-style-type: none"> <li>• Care delivered at CMHC</li> <li>• Patient educational materials adapted for target population (self-management of psychotic symptoms as well as depression, effects of antipsychotic medications)</li> <li>• Care coordination with both primary care and CMHC providers</li> </ul> |
| Multidisciplinary team                              | <ul style="list-style-type: none"> <li>• CMHC nurses as care managers</li> <li>• CMHC Psychiatrist as team psychiatrist</li> <li>• Endocrinologist consultant</li> </ul>                                                                                                                                                     |
| Population-based care                               | <ul style="list-style-type: none"> <li>• Caseload tracked in a registry (ACCESS spreadsheet), maintained by CMHC nurse care manager</li> </ul>                                                                                                                                                                               |
| Measurement-based care                              | <ul style="list-style-type: none"> <li>• Weekly caseload review by team during team meetings held at CMHC</li> <li>• Treat-to-Target outcomes: A1c, Systolic Blood Pressure, PHQ9 (among those with current depression)</li> </ul>                                                                                           |
| Evidence-based care                                 | <ul style="list-style-type: none"> <li>• Motivational interviewing to target health behavior change</li> <li>• Behavioral activation to target depression and negative symptoms of schizophrenia</li> <li>• Increased emphasis on tobacco, alcohol and substance use;</li> </ul>                                             |

|                                                                            | <b>Intervention (n= 18)</b> |          | <b>Usual care (n= 17)</b> |          | <b>p</b> |
|----------------------------------------------------------------------------|-----------------------------|----------|---------------------------|----------|----------|
|                                                                            | <b>N</b>                    | <b>%</b> | <b>N</b>                  | <b>%</b> |          |
| <b>Demographics</b>                                                        |                             |          |                           |          |          |
| Gender, male                                                               | 11                          | 61.1     | 12                        | 70.6     | .72      |
| Race, non-white                                                            | 10                          | 55.6     | 11                        | 64.7     | .73      |
| Educational level, HS / GED or less                                        | 12                          | 66.6     | 13                        | 81.3     | .38      |
| Marital status, married                                                    | 1                           | 5.6      | 1                         | 5.9      | .54      |
| <b>Clinical Characteristics</b>                                            |                             |          |                           |          |          |
| Primary psychiatric diagnosis of schizophrenia or schizoaffective disorder | 8                           | 44.4     | 8                         | 47.1     | .40      |
| On second generation antipsychotic medication                              | 7                           | 38.9     | 12                        | 70.6     | .09      |
| On clozapine or olanzapine                                                 | 2                           | 11.1     | 0                         | 0        | .49      |
| History of alcohol use disorder                                            | 3                           | 17.6     | 2                         | 11.7     | .34      |
| History of cocaine use disorder                                            | 2                           | 11.7     | 2                         | 11.7     |          |
| History of opioid use disorder                                             | 1                           | 5.9      | 0                         | 0        |          |
| Current smoker                                                             | 10                          | 55.6     | 9                         | 52.9     | 1.00     |
| Hypertension                                                               | 14                          | 76.4     | 13                        | 76.4     | .93      |
| Cardiovascular Disease                                                     | 4                           | 23.5     | 3                         | 17.6     | .74      |
| Congestive Heart Failure                                                   | 4                           | 23.5     | 2                         | 11.7     | .41      |
| Diabetes complications                                                     | 12                          | 66.6     | 6                         | 35.3     | .24      |
| On Insulin                                                                 | 10                          | 55.6     | 10                        | 58.8     | 1.00     |
| On antihypertensive medication                                             | 14                          | 76.4     | 13                        | 76.4     | .93      |
| On statin                                                                  | 10                          | 55.6     | 9                         | 52.9     | 1.00     |
|                                                                            | <b>Mean ± SD</b>            |          | <b>Mean ± SD</b>          |          | <b>p</b> |
| Age, Years                                                                 | 51.5 ± 10.3                 |          | 51.0 ± 9.1                |          | .88      |
| Fagerstrom nicotine dependence scale                                       | 5.7 ± 2.5                   |          | 6.1 ± 1.2                 |          | .67      |
| PHQ-9                                                                      | 12.9 ± 7.4                  |          | 10.4 ± 6.8                |          | .29      |
| BPRS                                                                       | 20.6 ± 10.6                 |          | 15.1 ± 5.2                |          | .07      |
| Hemoglobin A1c, %                                                          | 9.4 ± (2.2)                 |          | 8.3 ± (1.9)               |          | .13      |
| Systolic Blood pressure, mm Hg                                             | 135.8 ± 16.4                |          | 134.1 ± (16.8)            |          | .77      |
| LDL, ml/ dl                                                                | 110.6 ± (74.5)              |          | 77.1 ± (53.8)             |          | .14      |
| Triglycerides                                                              | 257.4 ± (146.2)             |          | 244.6 ± (179.7)           |          | .82      |
| BMI                                                                        | 37.5 ± (10.2)               |          | 35.2 ± (7.0)              |          | .44      |
